# Supplementary material for: Selected Histone Deacetylase Inhibitors Reverse the Frataxin Transcriptional Defect in a Novel Friedreich’s Ataxia Induced Pluripotent Stem Cell-Derived Neuronal Reporter System
Source: Front Neurosci. 2022 Feb 23;16:836476. doi: 10.3389/fnins.2022.836476 (PMC8904878; doi:10.3389/fnins.2022.836476)
Supplement: Supplementary file 1 [file Data_Sheet_1.pdf]

## **Supplementary Material**

### **Selected histone deacetylase inhibitors reverse the Frataxin transcriptional defect in a novel Friedreich's ataxia induced pluripotent stem cell-derived neuronal reporter system**

**Anna M. Schreiber<sup>1</sup>, Yanjie Li<sup>1</sup>, Yi-Hsien Chen<sup>2</sup>, Jill S. Napierala<sup>1</sup>, Marek Napierala\*<sup>1</sup>**

<sup>1</sup> Department of Biochemistry and Molecular Genetics, Stem Cell Institute, University of Alabama at Birmingham, Birmingham, AL, USA

<sup>2</sup>Genome Engineering and iPSC Center, Washington University, St Louis, MO, USA

|                        |        |
|------------------------|--------|
| Supplementary Figure 1 | page 2 |
| Supplementary Figure 2 | page 6 |
| Supplementary Figure 3 | page 7 |
| Supplementary Table 1  | page 8 |
| Supplementary Table 2  | page 9 |

**Supplementary Figure 1: DNA sequence of a fragment of the *FXN* gene.** A fragment of *FXN* is shown along with the *NLuc* gene and the five amino acids linker between the coding sequences. Exact locations of the gRNA and all primers used in PCR amplifications to validate correct *NLuc* integration are shown. An overview of the strategy is presented in Figure 1.

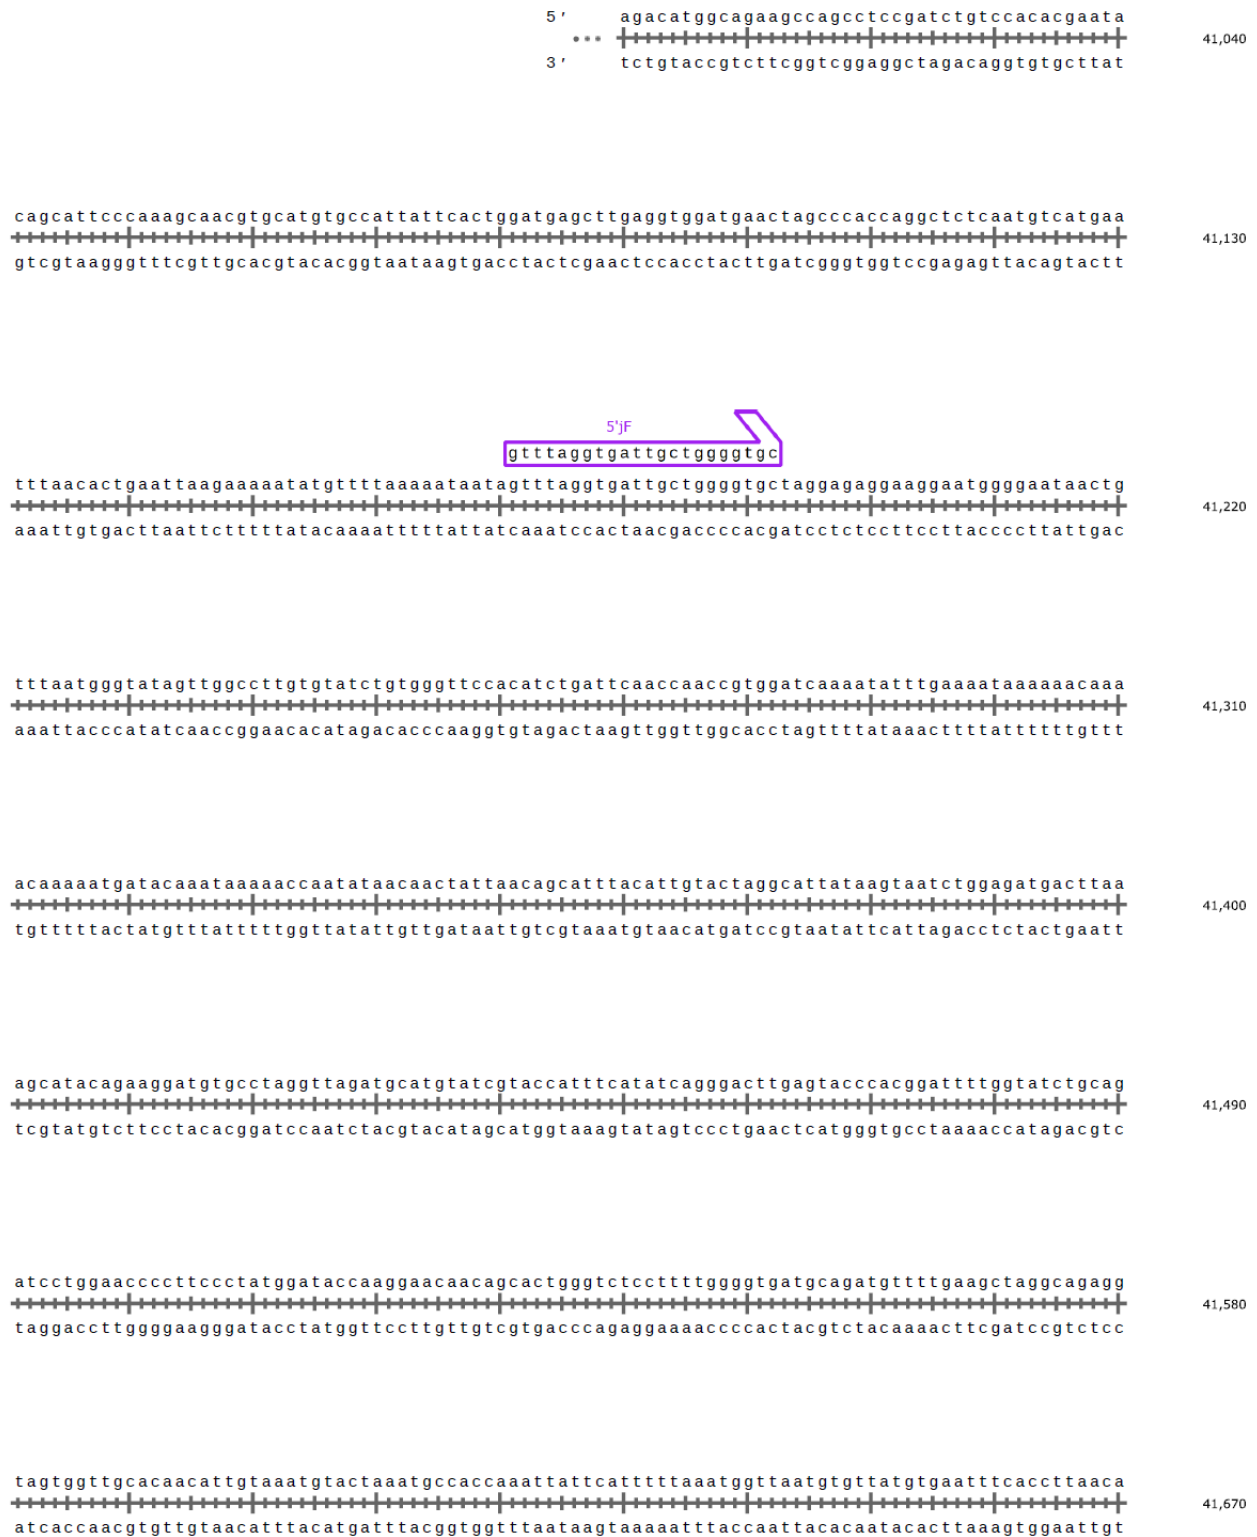

actaataatattataggttaaggcacaagttacatctgtagcacaaaaatggccctaatttttaaactgctccagcatagcaggtatc  
 41,760  
 tgattattataatatccattccgtgttcaatgtagacatcgtgtttttaccgggattaaaaattttgtgacgaggtcgtatcgtccatag

acatgtgaggtagcaaaagctggagatcaaagtgtgatacctggagacttatcagtaagggcacaatgtttttcagggtttgagaatca  
 41,850  
 tgtacactccatcggttttcgacctctagtttcacacatggacctctgaatagtcattcccagtttacaataaagtcacaaactcttagt

ttcttggaaattgttccagaagatatatcgtataactcttcttagatgctaagataagaaggcagatatatactagctcattttgtgttat  
 41,940  
 aagaaccttaacaaggtcttctatatagcatattgagaagaatctacgattctattcttccgtctatatgtgatcaggtaaaacacaata

WT\_F  
 tggttcatctgaagggtgtgctgtgg  
 42,030  
 ttcttagagctttactccagtcgaatttcttggggcagcatttgtggaatcagtggttcatctgaagggtgtgctgtggaattactatg  
 aaagatctcgaatgaggtcagttaaagaacccccgtcgtaaacaccttagtcaccaagtagacttcccacacgacaccttaatgatac

catttgttttgccttccagtggaacctaaagcgttatgactggactgggaaaaactgggtgtactcccacgacggcgtgtccctccatgagc  
 42,120  
 gtaaaaaaacagaaggtcacctggattcgaatactgacctgacctttttgaccacatgaggggtgctgccgcacaggaggtactcg

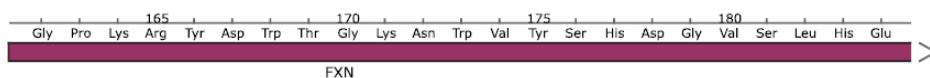

tgctggccgcagagctcactaaagccttaaaacaaaactggacttgtcttcttggcctattccggaaaagatgctggcggcggcggct  
 42,210  
 acgaccggcgtctcgagtgatttcggaatttttggtttgacctgaacagaaggaacccgataaggccttttctacgaccgccgccgga

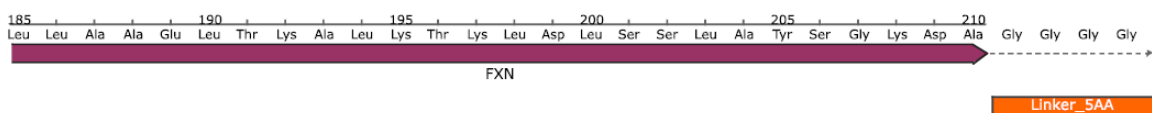

cggtcttcacactcgaagatttcgttggggactggcgacagacagccggctacaacctggaccaagtccttgaaacaggaggtgtgtcca  
 42,300  
 gccagaagtgtgagcttctaaagcaaccctgaccgctgtctgtcgccgatgttggacctggttcaggaacttgtccctccacacaggt

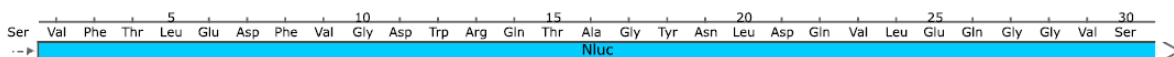

Linker\_5AA

agtgtgagcttctaaagcaacc  
 5'JR

gtttgtttcagaatctcggggtgtccgtaactccgatccaaaggattgtcctgagcgggtgaaaatgggctgaagatcgacatccatgtca  
 caaacaaagtcttagagccccacaggcattgaggctaggtttcctaacaggactcgccactttaccgacttctagctgtaggtacagt  
 |

42,390

Ser Leu Phe Gln Asn Leu Gly Val Ser Val Thr Pro Ile Gln Arg Ile Val Leu Ser Gly Glu Asn Gly Leu Lys Ile Asp Ile His Val  
 Nluc

tcattccggtatgaaggctctgagcggcgaccacaaatgggcccagatcgaaaaatttttaagggtgggtgtaccctgtggatgatcatcacttta  
 agtagggcatacttccagactcgccgctggtttaccgggtctagcttttttaaaaattccaccacatgggacacctactagtagtgaaat  
 |

42,480

Ile Ile Pro Tyr Glu Gly Leu Ser Gly Asp Gln Met Gly Gln Ile Glu Lys Ile Phe Lys Val Val Tyr Pro Val Asp Asp His His Phe  
 Nluc

aggatgatcctgcactatggcacactggtaatcgacggggttacgccgaacatgatcgactatttcggacggccgtatgaaggcatcgccg  
 tccactaggacgtgataccgtgtgaccattagctgccccaatgcggcttgtagctgataaagcctgcccgcatacttccgtagcggc  
 |

42,570

Lys Val Ile Leu His Tyr Gly Thr Leu Val Ile Asp Gly Val Thr Ile Glu Lys Ile Phe Gly Arg Pro Tyr Glu Gly Ile Ala  
 Nluc

tgttcgacggcaaaaagatcactgtaacaggacccctgtggaacggcaacaaaattatcgacgagcgccctgatcaaccccgacggctccc  
 acaagctgcggtttttctagtgtacattgtccctgggacaccttgccgtgtgttttaaatagctgctcgcggactagttggggctgcggaggg  
 |

42,660

Val Phe Asp Gly Lys Lys Ile Thr Val Thr Gly Thr Leu Trp Asn Gly Asn Lys Ile Ile Asp Glu Arg Leu Ile Asn Pro Asp Gly Ser  
 Nluc

3'JF  
 gttccgagtaaccatcaacggag

tgctgttccgagtaaccatcaacggagtgaccggctggcggctgtgcgaacgcattctggcgtgatgccagccccgttttaaggacatt  
 acgacaaggctcattggtagttgcctcactggccgaccgccgacacgcttgcgtaagaccgcactacgggtcggggcaaaattctgttaa  
 |

42,750

Leu Leu Phe Arg Val Thr Ile Asn Gly Val Thr Gly Trp Arg Leu Cys Glu Arg Ile Leu Ala  
 Nluc

gRNA\_NLuc

aaaagctatcaggccaagaccccagcttcattatgcagctgaggctcgtttttgtgtgtgtgtttatttttttattcctgcttt  
 ttttcgatagtcgggttctggggtcgaagtaatacgtcgactccagacaaaaaacacaacaacaataaaaaaaaaataaggacgaaa  
 |

42,840

gRNA\_NLuc

tgaggacagttgggctatgtgtcacagctctgtagaaagaatgtgttgccctctaccttgccccaagttctgatttttaatttctatgg  
 actcctgtcaacccgatacacagtgctcgagacatctttcttacacaacggaggatggaacgggggttcaagactaaaaattaaagatacc  
 |

42,930

acacaacggaggatggaacgggggt  
 WT\_Rev

aagattttttgattgtcggatttcctccctcacatgatacccttatcttttataatgtcttatgcctatacctgaatataacaacctt  
 ttctaaaaaacctaacagcctaaggaggaggatgtactatggggaatagaaaattattacagaatacggatatggacttatattgttgaa  
 |

43,020

taaaaaagcaaaataataagaaggaaaaattccaggagggaataatgtcttcactcttcattctttgaaggatttactgcaagaag  
 43,110  
 attttttcgtttttatttcttctttttaaggctcctccctttacttaacagaagtgagaagtaagaaacttcctaaatgacgttcttc

tacatgaagagcagctgggtcaacctgctcactgttctatctccaaatgagacacattaaagggtagcctacaaatgttttcaggcttctt  
 43,200  
 atgtacttctcgtcgaccagttggacgagtgacaagatagaggtttactctgtgtaatttcccatcggaatgtttacaaaagtccgaagaa

tcaaagtgtgaagcatttctgagctcttttagcattgaagtgtcgaaagcaactcacacgggaagatcatttcttattttgtgctctgtgact  
 43,290  
 agtttcacattcgtgaagactcgagaaatcgtaacttcacagctttcgttgagtgtgccttcttagtaagaataaacacgagacactga

gccaaaggtgtggcctgcactgggtgtccaggagacctagtgtgtttctccacatatccacatacgtgtctgtgtgtatatatatatt  
 43,380  
 cggttccacacggacgtgacccaacaggtccctctggatcacgacaaagaggggtgtataagtgtatgcacagacacacatatataaaa

ttcaatttaaagggttagtatggaatcagctgctacaagaatgcaaaaaatcttccaaagacaagaaaagaggaaaaaaagccgttttca  
 43,470  
 aaagttaaatttccaatcataccttagtcgacgatgttcttactgttttttagaaggttctgttcttttctccttttttcggcaaaagt

tgagctgagtgatgtagcgtacaaacaaaatcatggagctgaggaggtgccttgtaaacatgaaggggcagataaaggaaggagatact  
 43,560  
 actcgactcactacatcgcatgttgttttagtacctcgactcctccacggaacatttgtacttccccgtctatttcttctctctatga

catgttgataaagagagccctggctctagacatagttcagccacaaagtagttgtccctttgtggacaagtttcccaaattccctggacc  
 43,650  
 gtacaactatttctcctcgggaccaggatctgtatcaagtcggtgtttcatcaacagggaacacctgttcaaaggggttaaggggacctgg

tctgcttccccatctgttaaatgagagaatagagtatggttgattcccagcattcagtggtcctgtcaagcaacctaacaggctagtctt  
 43,740  
 agacgaaggggtagacaatttactctcttattctataccaactaagggtcgtaagtcaccaggacagttcgttggattgtccgatcaaga

aattccctattgggtagatgaggggatgacaaagaacagtttttaagctatataggaacacattgttattgggtgttgcctatcgtgattt  
 43,830  
 ttaagggaataacctatctactccccactgtttcttgtcaaaaattcgatatatcctttgtaacaataaccacaacgggatagcactaaa

taagggataacctatctactccc  
 3'JR

cagttgaattcatgtgaaaataatagccatccttggcctggcgcggtggctcacacctgtaatcccagcacttttggaggccaaggtggg  
 43,920  
 gtcaacttaagtacacttttattatcggtaggaaccggaccgcccaccgagtggtggacattagggctgtgaaaacctccgggtccacc

tggatcacctgaggtcaggagttcaagaccagcctggccaacatgatgaaaccccgctcttactaaaaatacaaaaaatt 3'  
 acctagtggaactccagtcctcaagttctggtcggaccgggtgtactactttggggcagagatgatttttatgttttttaa 5' 44,000

**Supplementary Figure 2: Screening of an epigenetic compound library to identify novel inducers of *FXN* expression.** Complete datasets from two rounds of screening, four 96-well plates each, are presented. All compounds of the APExBIO DiscoveryProbe™ Epigenetics Compound Library were tested at 10  $\mu$ M concentration for 24 h. Luminescence signal was plotted independently per each plate. Green line corresponds to plate average signal; dashed lines indicate average signal plus 1, 2 and 3 standard deviations of the mean.

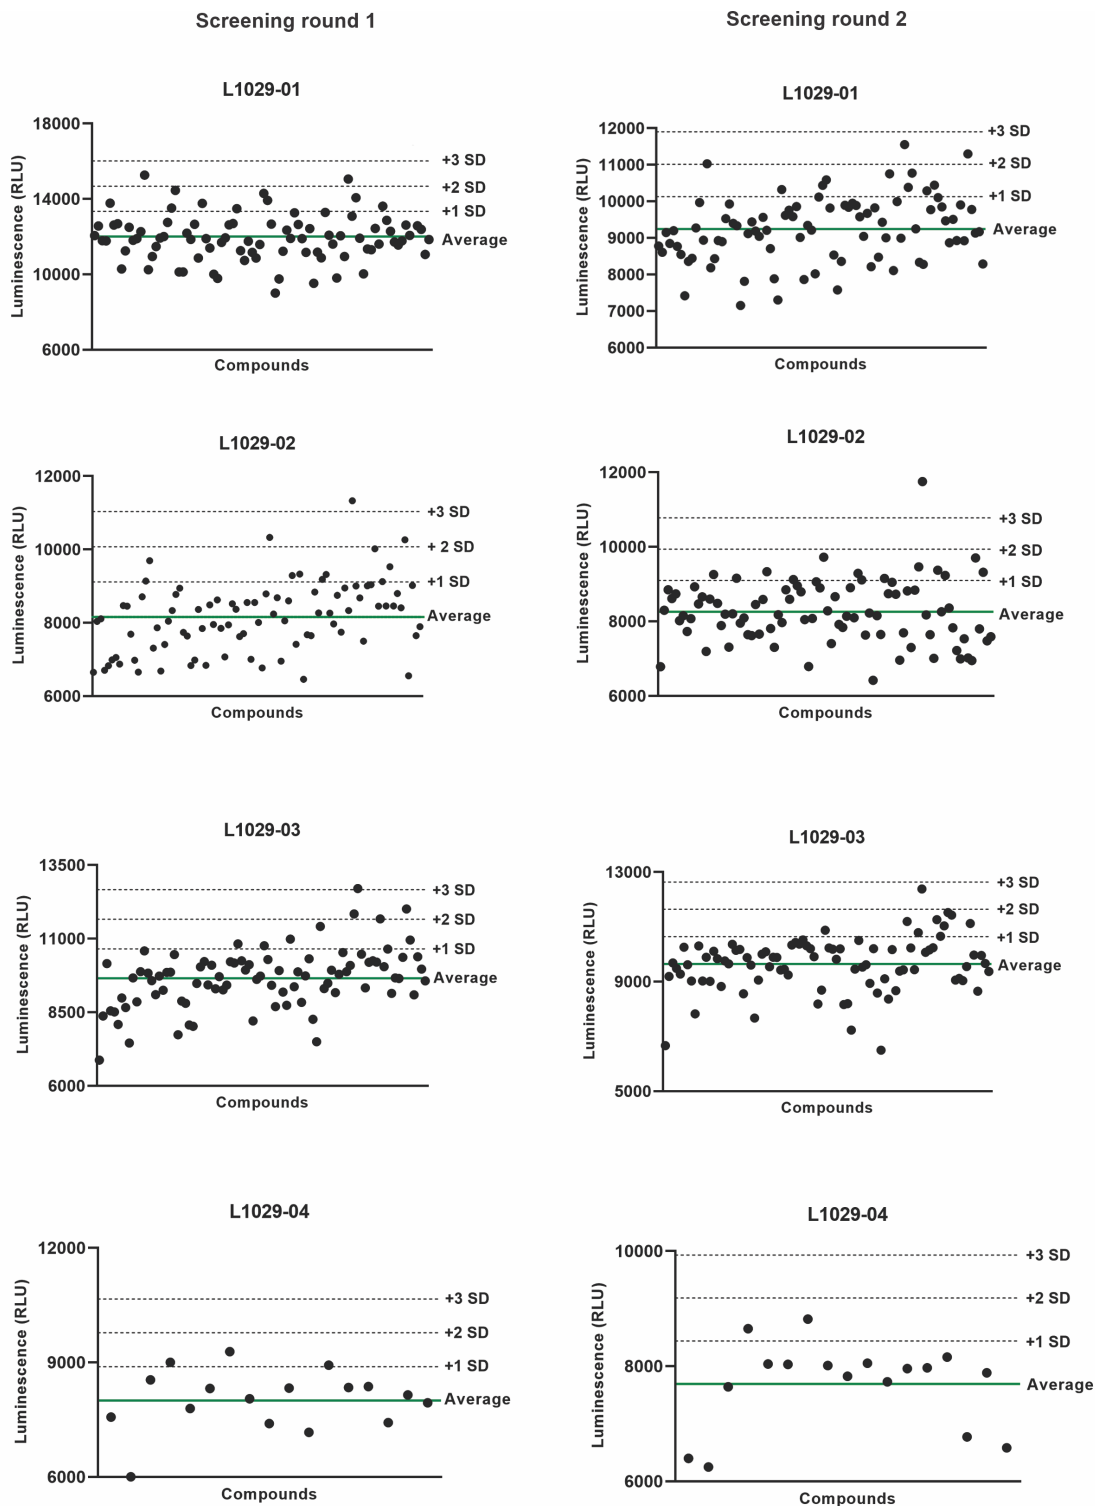

**Supplementary Figure 3: Effect of selected compounds on *FXN* expression in control NPCs.**

(A) Results of qRT-PCR analysis of *FXN* mRNA expression upon 48 h treatment with 10  $\mu$ M CI994, Mocetinostat, Entinostat, UF 010 and Cerdulatinib. Results represent mean  $\pm$  SD from three technical repeats; \* indicates  $p < 0.05$  (one-way ANOVA). DMSO treatment served as a control. (B) *FXN* protein expression determined by western blot after treatment with indicated compounds for 48 h at 10  $\mu$ M. Signals corresponding to mature *FXN* (*FXN*-M) and intermediate *FXN* (*FXN*-I) are indicated. GAPDH and Ponceau S (C) staining served as loading controls. (D) Quantification of *FXN*-M levels shown in panel B relative to Ponceau S staining.

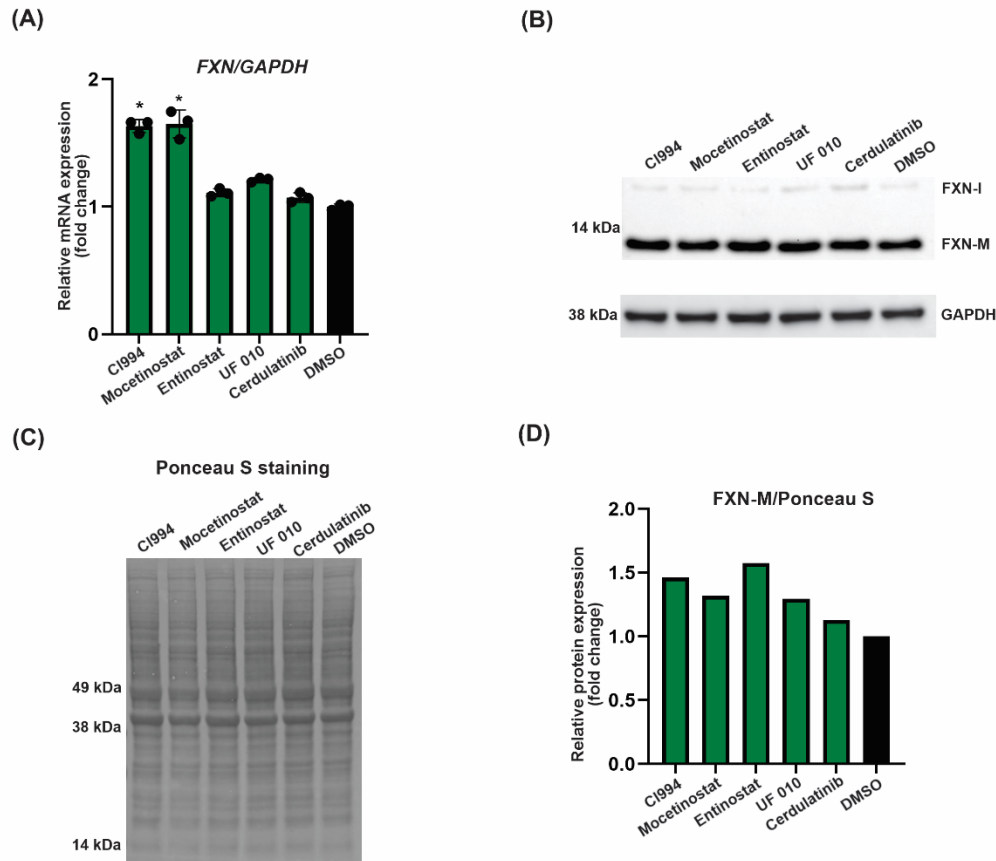

**Supplementary Table 1: Characteristics of induced pluripotent stem cell lines used in the study.**

| <b>Type:</b> | <b>Age of disease onset:</b> | <b>Sex:</b> | <b>GAA repeats:</b> |
|--------------|------------------------------|-------------|---------------------|
| FRDA 4676    | 10                           | M           | 867/867             |
| FRDA 86      | 18                           | F           | 450/450             |
| FRDA 4259    | 15                           | M           | 550/830             |
| Control 7522 | -                            | F           | -                   |

**Supplementary Table 2: Complete list of compounds included in APExBIO DiscoveryProbe™ Epigenetics Compound Library.** For each compound the CAS number, molecular weight, formula, targeted pathway and molecular target are presented.

| Item Name                                  | CAS Number   | M.W.    | Formula             | Pathway               | Target                    | Information                                                     |
|--------------------------------------------|--------------|---------|---------------------|-----------------------|---------------------------|-----------------------------------------------------------------|
| Dactinonin                                 | 103060-93-3  | 1620.67 | C72H101N17O26       | Cancer Biology        | DNA Synthesis             | Calcium-dependent antibiotic                                    |
| Gemcitabine HCl                            | 121111-03-9  | 299.66  | C8H11F2N3O4.HCl     | Cancer Biology        | DNA Synthesis             | Inhibits DNA synthesis, deoxycytidine analog                    |
| XAV-939                                    | 284028-89-3  | 312.31  | C14H11F3N2O8        | Cancer Biology        | PARP                      | Tamoxifen 1/2 inhibitor                                         |
| Decitabine (NSC127716, SAZA-CdR)           | 3353-33-5    | 228.08  | C8H9F3N3O5          | Cancer Biology        | DNA Methyltransferase     | Deoxycytidine analog and cellular differentiation inducer       |
| 5-Azacytidine                              | 330-67-2     | 244.2   | C8H9F3N3O5          | Cancer Biology        | DNA Methyltransferase     | DNA methyltransferase inhibitor                                 |
| BIX 01294                                  | 936693-62-2  | 490.65  | C28H38N6O2          | Cancer Biology        | Histone Methyltransferase | G9a and GLP inhibitor                                           |
| Bromodomain inhibitor, (+)-JG1             | 1268524-70-4 | 456.99  | C23H28ON4O2         | Cancer Biology        | Bromodomain               | BET bromodomain inhibitor                                       |
| Lomeguarato                                | 152441-09-0  | 326.17  | C18H28N4O6          | Cancer Biology        | DNA Methyltransferase     | MeKMT inhibitor                                                 |
| RO-108                                     | 46208-36-1   | 334.33  | C18H14N4O4          | Cancer Biology        | DNA Methyltransferase     | DNA methyltransferase inhibitor                                 |
| UNC0638                                    | 1265880-76-7 | 509.72  | C32H44N6O2          | Cancer Biology        | Histone Methyltransferase | G9a/GLP HMTase inhibitor, potent and selective                  |
| Zebularine                                 | 3690-10-6    | 228.2   | C8H12N2O5           | Cancer Biology        | DNA Methyltransferase     | DNA methylation inhibitor                                       |
| Carboxatin                                 | 41575-94-4   | 371.25  | C6H12N2O4P          | Cancer Biology        | DNA Synthesis             | Antitumor agent that forms platinum-DNA adducts                 |
| Elicic acid                                | 476-66-4     | 302.19  | C14H8O8             | Cancer Biology        | Topoisomerase             | Casein kinase 2 (CK2) inhibitor                                 |
| (+)-Epigallocatechin gallate (EGCG)        | 989-51-5     | 458.37  | C22H18O11           | Cancer Biology        | PKC                       | Antioxidant, antitumor and antitumor agent                      |
| ABT-888 (Velpar)                           | 912444-00-9  | 244.3   | C18H18N4O           | Cancer Biology        | PARP                      | Potent PARP inhibitor                                           |
| Ruxotinib (INC018424)                      | 941678-49-5  | 306.37  | C17H18N6            | Cancer Biology        | JAK                       | JAK inhibitor                                                   |
| AZD1152                                    | 722543-31-9  | 587.54  | C26H31F17N10O6P     | Cancer Biology        | Aurora Kinase             | Aurora B Kinase inhibitor, highly potent and selective          |
| Bardoxiprine methyl                        | 218620-23-4  | 505.69  | C32H43N3O4          | Cancer Biology        | JAK                       | IKK inhibitor, potent antioxidant, inflammation modulator       |
| Curcumin                                   | 458-37-7     | 368.38  | C21H20O6            | Cancer Biology        | KEAP1-Nrf2                | Tyrosinase inhibitor                                            |
| CK-5258                                    | 1202916-90-2 | 461.94  | C26H24O4N3O3        | Cancer Biology        | Pim                       | Pan-Pim kinases inhibitor                                       |
| Daminozide                                 | 1596-94-5    | 160.17  | C8H12N2O3           | Cancer Biology        | HDAC                      | KDMAA inhibitor                                                 |
| OSK126                                     | 1346514-67-9 | 526.67  | C31H38N6O2          | Cancer Biology        | ETH2                      | ETH2 inhibitor                                                  |
| OSK343                                     | 1346704-33-3 | 541.69  | C31H38N7O2          | Cancer Biology        | ETH2                      | ETH2 inhibitor, potent, selective and cell permeable            |
| JANEX-1                                    | 202475-60-3  | 297.31  | C16H15N3O3          | Cancer Biology        | JAK                       | JAK3 inhibitor                                                  |
| M-2                                        | 1217138-62-5 | 375.55  | C18H25N5S2          | Cancer Biology        | Menin-MLL                 | Menin-MLL inhibitor                                             |
| ML-4827                                    | 1038915-50-4 | 320.39  | C18H22N4O           | Cancer Biology        | PARP                      | PARP-1/2 inhibitor, potent and selective                        |
| NUP-800805                                 | 1052489-49-8 | 490.65  | C27H38F2N6O         | Cancer Biology        | JAK                       | ATP-competitive JAK2 inhibitor                                  |
| OTX-015                                    | 202590-98-5  | 491.99  | C26H22ON5O2S        | Cancer Biology        | Bromodomain               | BRD inhibitor                                                   |
| Pyridone 6                                 | 457081-03-7  | 309.34  | C18H16N2O           | Cancer Biology        | JAK                       | Pan-JAK inhibitor                                               |
| Reversin                                   | 658620-32-6  | 393.49  | C21H27N7O           | Chromatin/EpiGenetics | Aurora Kinase             | A3 adenosine receptor antagonist, ARK-1-1/2-3 inhibitor         |
| RO3233                                     | 1215493-69-9 | 360.59  | C28H28N6O2          | Cancer Biology        | HDAC                      | Brain-penetrant HDAC inhibitor                                  |
| Ruxotinib phosphate                        | 1052939-17-7 | 404.36  | C17H21N6O4P         | Chromatin/EpiGenetics | JAK                       | JAK1/JAK2 inhibitor                                             |
| SB1317                                     | 937270-47-8  | 372.46  | C23H24N4O           | Cancer Biology        | JAK                       | COX, JAK and FLT inhibitor                                      |
| Tasquinimod                                | 254964-60-8  | 406.36  | C20H17F3N2O4        | Cancer Biology        | HDAC                      | Antiangiogenic and antineoplastic agent                         |
| UNC1125                                    | 1418800-43-9 | 529.72  | C32H43N6O2          | Chromatin/EpiGenetics | Bromodomain               | Chemical probe for the methyltransferase (K9me)                 |
| XL019                                      | 948755-66-6  | 444.63  | C32H43N6O2          | Cancer Biology        | JAK                       | JAK2 inhibitor, potent and selective                            |
| XL228                                      | 988208-07-4  | 437.54  | C23H31N8O           | Cell Cycle/Checkpoint | Aurora Kinase             | IGF1R/AURORA/ROPR1-3/ABL/SRC family kinases inhibitor           |
| Velpar dihydrochloride                     | 912445-05-7  | 317.21  | C18H18ON4O          | Chromatin/EpiGenetics | PARP                      | PARP-1/2 inhibitor                                              |
| AZD1208                                    | 1204144-28-4 | 378.48  | C21H21N3O3S         | Chromatin/EpiGenetics | Pim                       | Pim kinase inhibitor                                            |
| A-769632                                   | 844469-71-4  | 360.39  | C28H28N6O2          | Cancer Biology        | Others                    | AMPK activator, potent and reversible                           |
| BI-2536                                    | 755038-02-9  | 521.67  | C28H38N7O3          | Cell Cycle/Checkpoint | PLK                       | Plk1 inhibitor, potent and ATP-competitive                      |
| Rodintostat (ACY-1215)                     | 1316214-52-4 | 433.5   | C34H27N6O3          | DNA Damage/DNA Repair | HDAC                      | Selective HDAC6 inhibitor                                       |
| Vorinostat (SAHA, MK0683)                  | 148647-78-9  | 264.3   | C14H20N2O3          | DNA Damage/DNA Repair | HDAC                      | HDAC inhibitor                                                  |
| Moctinosat (MOC00103, MOC103)              | 726169-73-9  | 396.44  | C23H28N6O           | DNA Damage/DNA Repair | HDAC                      | HDAC inhibitor, isotype-selective and potent                    |
| JNA-25481585                               | 975320-29-6  | 394.48  | C28H28N6O2          | Cancer Biology        | HDAC                      | Potent HDAC inhibitor                                           |
| PCI-34051                                  | 960762-95-6  | 396.32  | C17H16N2O3          | DNA Damage/DNA Repair | HDAC                      | HDAC inhibitor, potent and selective                            |
| CUDO-101                                   | 1012054-59-9 | 434.49  | C28H28N4O           | DNA Damage/DNA Repair | HDAC                      | Multitargeted HDAC inhibitor                                    |
| TP2357 (Givinstat)                         | 732302-99-7  | 475.97  | C34H27N3O4.HCl.H2O  | DNA Damage/DNA Repair | HDAC                      | HDAC inhibitor                                                  |
| MO1558                                     | 652475-26-4  | 314.31  | C17H16N2O3          | Cancer Biology        | Class I HDAC              | Class I HDAC inhibitor, potent and selective                    |
| Pracinostat (SB939)                        | 929016-96-6  | 358.48  | C28H30N4O2          | DNA Damage/DNA Repair | HDAC                      | Pan-HDAC inhibitor                                              |
| Belinostat (PXD101)                        | 414864-00-9  | 318.35  | C15H14N2O4S         | DNA Damage/DNA Repair | HDAC                      | Hydroxamate-type HDAC inhibitor                                 |
| CUDO-907                                   | 1339928-25-4 | 508.55  | C23H24N6O4S         | DNA Damage/DNA Repair | HDAC                      | Potent P300/KAC inhibitor                                       |
| PCI-24781 (ORA-024781)                     | 783355-60-2  | 397.42  | C21H22N6O3          | Cancer Biology        | HDAC                      | Pan-HDAC inhibitor                                              |
| Venonic and sodium salt (Sodium valproate) | 1089-65-5    | 168.19  | C8H16N2O4           | DNA Damage/DNA Repair | HDAC                      | HDAC inhibitor                                                  |
| Drocinostat                                | 99873-43-5   | 243.69  | C11H14N2O3          | DNA Damage/DNA Repair | HDAC                      | Selective HDAC inhibitor                                        |
| Tubastatin A                               | 1252003-15-8 | 335.4   | C20H21N3O2          | DNA Damage/DNA Repair | HDAC                      | HDAC inhibitor, potent and selective                            |
| CI994 (Tacedinaline)                       | 112523-64-2  | 269.3   | C15H18N2O2          | Cancer Biology        | HDAC                      | HDAC inhibitor                                                  |
| LAQ824 (NVP-LAQ824, Dactinostat)           | 404951-63-7  | 379.46  | C22H25N3O3          | DNA Damage/DNA Repair | HDAC                      | HDAC inhibitor, potent and novel                                |
| AP-42 (OSU-HDAC2)                          | 935881-37-1  | 312.36  | C22H25N3O3          | DNA Damage/DNA Repair | HDAC                      | HDAC inhibitor, novel and potent                                |
| MS44                                       | 251456-60-7  | 307.39  | C16H25N3O3          | DNA Damage/DNA Repair | HDAC                      | HDAC inhibitor, potent and cell-permeable                       |
| Scorbid                                    | 287383-59-9  | 326.35  | C18H18N2O4          | Cancer Biology        | HDAC                      | HDAC inhibitor, novel and cell-permeable                        |
| Sodium Phenylbutyrate                      | 1716-12-7    | 186.18  | C10H11O2Na          | DNA Damage/DNA Repair | HDAC                      | Histone deacetylase inhibitor                                   |
| MLN8237 (Alisertib)                        | 1028488-01-2 | 519.82  | C27H30N6O6          | Chromatin/EpiGenetics | Aurora Kinase             | Aurora A Kinase inhibitor, Potent and selective                 |
| VX-680 (MK-0457, Tazemetib)                | 639089-54-6  | 464.69  | C28H32N6O6          | Cancer Biology        | Aurora Kinase             | Aurora Kinase inhibitor                                         |
| Banarostat (AZD1152-HQPA)                  | 722544-51-6  | 507.56  | C26H30N7O3          | Chromatin/EpiGenetics | Aurora Kinase             | Aurora Kinase B inhibitor, Potent and selective                 |
| MLN4439                                    | 331771-20-1  | 513.69  | C28H31N5O4          | Chromatin/EpiGenetics | Aurora Kinase             | Aurora Kinase inhibitor, potent and selective                   |
| MLN8234                                    | 869363-13-3  | 476.86  | C25H15F2N4O2        | Chromatin/EpiGenetics | Aurora Kinase             | Aurora A inhibitor                                              |
| JNJ-739621                                 | 443787-66-4  | 394.36  | C15H13F2N6O3S       | Cancer Biology        | Aurora Kinase             | Potent COX/Aurora kinase inhibitor                              |
| Danuseret (PHA-739358)                     | 827318-97-8  | 474.55  | C28H36N6O3          | Tyrosine Kinase       | c-RET                     | Pan-Aurora kinase inhibitor                                     |
| AT5283                                     | 896466-04-9  | 381.43  | C18H23N7O2          | Chromatin/EpiGenetics | Aurora Kinase             | Aurora Kinase/JAK inhibitor                                     |
| Hesperadin                                 | 422513-13-1  | 516.65  | C28H32N4O3S         | Chromatin/EpiGenetics | Aurora Kinase             | Aurora B Kinase inhibitor                                       |
| AKI-502                                    | 548556-90-2  | 503.68  | C28H31N7O4          | Cancer Biology        | Aurora Kinase             | Aurora kinase inhibitor                                         |
| ML-6108 (VX-680)                           | 1010085-13-8 | 461.94  | C22H21ClF3N3O3S     | Chromatin/EpiGenetics | Aurora Kinase             | Aurora A Kinase inhibitor, highly selective                     |
| SN6-314 Mesylate                           | 1146618-41-8 | 527.04  | C18H15ON6O6.C4H4O3S | Chromatin/EpiGenetics | Aurora Kinase             | Aurora A/B/C Kinases inhibitor, potent and selective            |
| PHA-680532                                 | 398493-79-3  | 501.62  | C28H35N7O2          | Chromatin/EpiGenetics | Aurora Kinase             | Aurora Kinase inhibitor, novel and potent                       |
| NUP-2495                                   | 1020667-72-6 | 434.46  | C28H28N4O           | Cancer Biology        | FLT3                      | Multitargeted inhibitor                                         |
| TAC-901                                    | 934541-31-4  | 504.64  | C28H32N6O3S         | Chromatin/EpiGenetics | Aurora Kinase             | Novel Aurora A/B inhibitor                                      |
| CYC116                                     | 693228-63-6  | 368.46  | C18H20N6O6          | Chromatin/EpiGenetics | Aurora Kinase             | Potent Aurora A/B inhibitor                                     |
| Aurora A inhibitor I                       | 1158838-45-9 | 588.07  | C31H31O17N7O2       | Cell Cycle/Checkpoint | Aurora Kinase             | Aurora A inhibitor                                              |
| EMD-2076                                   | 1291074-87-7 | 525.56  | C28H31N7O6          | Chromatin/EpiGenetics | Aurora Kinase             | Aurora Kinase inhibitor                                         |
| CCT129202                                  | 934353-75-1  | 375.47  | C28H31N7O6          | Chromatin/EpiGenetics | Aurora Kinase             | Selective Aurora A/ATD inhibitor                                |
| CCT137950                                  | 942947-93-5  | 497.02  | C28H32ON8O6         | Cancer Biology        | Aurora Kinase             | Aurora Kinase inhibitor, ATP-competitive and potent             |
| Tofacitinib (CP-690550) Citrate            | 1095382-05-0 | 551.48  | C28H31BN8O          | Chromatin/EpiGenetics | Aurora Kinase             | Aurora A/B/C inhibitor                                          |
| TO101348 (SAR302503)                       | 540737-29-9  | 504.49  | C18H28N6O.C6H8O7    | Chromatin/EpiGenetics | JAK                       | Potent JAK inhibitor                                            |
| AZD1480                                    | 936091-25-8  | 524.68  | C27H36N6O3S         | Chromatin/EpiGenetics | JAK                       | JAK-2 inhibitor, potent and selective                           |
| Tofacitinib (CP-690550, Tazocitinib)       | 936666-88-9  | 348.77  | C14H14CPN8O         | Cancer Biology        | JAK                       | JAK2 inhibitor, ATP-competitive and novel                       |
| Ac-490                                     | 477600-75-2  | 312.37  | C18H20N6O           | Chromatin/EpiGenetics | JAK                       | Janus Kinase inhibitor                                          |
| WP1066                                     | 133550-30-8  | 294.3   | C17H14N2O3          | JAK/STAT Signaling    | EGFR                      | JAK2/EGFR inhibitor                                             |
| Biciclitinib (LY3009104, INC028050)        | 867064-38-1  | 358.22  | C17H14BN3O          | Chromatin/EpiGenetics | JAK                       | JAK2/STAT3 inhibitor, cell-permeable                            |
| CYT387                                     | 1181594-09-7 | 371.42  | C18H20N6O3          | Chromatin/EpiGenetics | JAK                       | JAK1/JAK2 inhibitor, selective only, bioavailable               |
| TO101209                                   | 1056634-68-4 | 414.46  | C23H22N6O2          | Chromatin/EpiGenetics | JAK                       | JAK-1/2 inhibitor, ATP-competitive                              |
| CEP-33779                                  | 936091-14-4  | 509.67  | C26H35N7O2S         | Tyrosine Kinase       | c-RET                     | JAK2/3 inhibitor                                                |
| LY2784544                                  | 1287704-67-6 | 462.67  | C24H26N6O2S         | Cancer Biology        | JAK                       | JAK2 inhibitor, highly selective                                |
| W44P154                                    | 1225236-68-6 | 469.54  | C28H36N6O2          | Chromatin/EpiGenetics | JAK                       | JAK2 inhibitor, highly potent and selective                     |
| ZM 39923 HCl                               | 211655-04-3  | 376.2   | C16H14BN3O3         | Cancer Biology        | JAK                       | JAK2 inhibitor, highly potent and selective                     |
| BM5-91543                                  | 1021668-92-7 | 367.91  | C23H25NO.HCl        | JAK/STAT Signaling    | JAK                       | JAK3 inhibitor, potent and selective                            |
| BMN 673                                    | 1271022-90-2 | 432.52  | C23H28N8O           | JAK/STAT Signaling    | JAK                       | JAK2 inhibitor, selective small molecule                        |
| Opavir (AZD2281, KU-0059436)               | 1207456-01-6 | 380.35  | C18H14F2N6O         | DNA Damage/DNA Repair | PARP                      | Potent PARP inhibitor                                           |
| Rucaparib (ACQ14639, PF-01367338)          | 753113-22-0  | 434.46  | C24H23F3N4O3        | Cancer Biology        | PARP                      | Potent PARP1/2 inhibitor                                        |
| Iniparib (BSI-201)                         | 458668-92-9  | 421.36  | C18H18F3N3O3.H3PO4  | Chromatin/EpiGenetics | PARP                      | Potent PARP inhibitor                                           |
| AC-14361                                   | 160003-66-7  | 282.03  | C7H5N2O3            | Chromatin/EpiGenetics | PARP                      | PARP1 inhibitor, intravenously administered                     |
| FJ34 hydrochloride                         | 328543-09-5  | 320.39  | C18H22N4O           | DNA Damage/DNA Repair | PARP                      | Potent PARP1 inhibitor                                          |
| A-666452                                   | 344449-15-7  | 331.8   | C17H17N3O2.HCl      | Cancer Biology        | PARP                      | PARP inhibitor, potent and cell-permeable                       |
| INO-1001                                   | 934162-61-5  | 324.35  | C18H17FN4O          | Chromatin/EpiGenetics | PARP                      | PARP-1/2 inhibitor, highly potent                               |
| UPF 1069                                   | 3544-34-9    | 136.15  | C7H8N2O             | Chromatin/EpiGenetics | PARP                      | Potent PARP inhibitor                                           |
| AZD2461                                    | 1048371-03-4 | 279.29  | C17H13N3O           | Chromatin/EpiGenetics | PARP                      | Selective PARP2 inhibitor                                       |
| EPZ5676                                    | 1174043-19-3 | 395.43  | C22H22F3N3O3        | Cancer Biology        | PARP                      | Novel PARP inhibitor                                            |
| SOC 0846                                   | 1386289-87-8 | 562.71  | C30H42N6O3          | Chromatin/EpiGenetics | Histone Methyltransferase | DOT1L inhibitor, potent and SAM competitive                     |
| Enticaponone                               | 1561178-17-3 | 618.57  | C28H40BN7O4         | Chromatin/EpiGenetics | Histone Methyltransferase | DOT1L inhibitor, highly potent and selective                    |
| EPZ004777                                  | 130929-57-6  | 305.29  | C14H15N3O5          | Chromatin/EpiGenetics | Histone Methyltransferase | COMT inhibitor                                                  |
| EPZ005687                                  | 1338466-77-5 | 539.67  | C28H41N7O4          | Cancer Biology        | Histone Methyltransferase | DOT1L inhibitor                                                 |
| Thioquinone                                | 1396772-26-1 | 539.67  | C32H37N5O3          | Chromatin/EpiGenetics | Histone Methyltransferase | ETH2 inhibitor, potent and selective                            |
| SRT1720 HCl                                | 154-42-1     | 167.19  | C9H9N5              | DNA Damage/DNA Repair | DNA Methyltransferase     | Purine antimetabolite                                           |
| EX 527 (S6ND014196)                        | 1001645-58-4 | 506.02  | C25H23N7O6.HCl      | Chromatin/EpiGenetics | Sirtuin                   | SIRT1 activator                                                 |
| Resveratrol                                | 49843-88-3   | 248.71  | C15H13ON2O          | Cancer Biology        | Sirtuin                   | SIRT1 activator                                                 |
| Sirtuin                                    | 501-36-0     | 228.24  | C14H12O3            | Chromatin/EpiGenetics | Sirtuin                   | SIRT1 activator                                                 |
| PF-1 (PF-6405761)                          | 410536-97-9  | 394.47  | C28H32N6O2          | Chromatin/EpiGenetics | Sirtuin                   | SIRT1 activator                                                 |
| Bromodomain                                | 1403764-72-6 | 347.39  | C16H17N3O4S         | Chromatin/EpiGenetics | Bromodomain               | BET inhibitor                                                   |
| Bromodomain                                | 1619994-69-2 | 404.44  | C17H22N6O4S         | Cancer Biology        | Bromodomain               | Bromodomain inhibitor, non-selective                            |
| RO-4882 (AIP1517)                          | 808118-40-3  | 352.34  | C18H18N2O6          | Angiogenesis          | HIF                       | HIF prolyl-hydroxylase inhibitor                                |
| 2-Methoxyestradiol (2-MeOE2)               | 362407-2     | 302.41  | C18H26O3            | Apoptosis             | Apoptosis Inducers        | Apoptotic, antitumor and antiangiogenic agent                   |
| IQX2 (Quinoxaline)                         | 931398-72-0  | 352.34  | C18H14N2O2          | Angiogenesis          | HIF                       | HIF-1α prolyl-hydroxylase-2 (PHD2) inhibitor                    |
| OSK JA HCl                                 | 1373423-53-0 | 483.96  | C24H27N6O2.HCl      | Cancer Biology        | Histone Demethylases      | Inhibitor of H3K27 demethylase, JMD3, potent and cell-permeable |
| OSK JA                                     | 1373423-53-7 | 389.45  | C24H27N6O2          | Chromatin/EpiGenetics | Histone Demethylases      | H3K27 demethylase, JMD3, potent and cell-permeable              |
| SOI-1775 free base                         | 1025065-69-3 | 405.42  | C28H22F3N6O         | Chromatin/EpiGenetics | Pim                       | Pim kinase inhibitor, ATP-competitive                           |
| SMN-4                                      | 438190-29-5  | 273.23  | C14H15F3N3O5        | JAK/STAT Signaling    | Pim                       | Potent Pim inhibitor                                            |
| Tenovin-1                                  | 380315-80-0  | 369.5   | C22H23N3O3S         | Apoptosis             | p53                       | SIRT2 inhibitor, activates p53                                  |
| Mitomycin C                                | 50-07-7      | 334.33  | C15H18N4O6          | Apoptosis             | Apoptosis Inducers        | Inhibits DNA synthesis, antibiotic and antitumor agent          |
| Anacardic acid                             | 16611-84-0   | 348.52  | C22H36O3            | Chromatin/EpiGenetics | Aurora Kinase             | HAT inhibitor                                                   |
| SOC-CBP30                                  | 1613695-14-9 | 509.04  | C28H33ON4O3         | Cancer Biology        | Bromodomain               | Inhibitor of CREBBP/EP300 bromodomain, potent                   |
| NO-5170                                    | 840843-37-3  | 461.68  | C25H25N5O6S         | Cancer Biology        | HDAC                      | HDAC inhibitor                                                  |
| LMK 235                                    | 1418033-25-6 | 294.35  | C15H22N2O4          | DNA Damage/DNA Repair | HDAC                      | HDAC4/HDAC5 inhibitor                                           |
| NOH 51                                     | 848354-66-5  | 390.56  | C20H25N2O2S2        | Cancer Biology        | HDAC                      | Histone deacetylase (HDAC) inhibitor                            |
| NSC 3852                                   | 3586-26-2    | 174.16  | C9H8N2O2            | DNA Damage/DNA Repair | HDAC                      | HDAC inhibitor                                                  |
| SBHA                                       | 38937-66-5   | 264.22  | C18H25N2O4          | DNA Damage/DNA Repair | HDAC                      | HDAC4/HDAC5 inhibitor, cell-permeable                           |
| TOH 106                                    | 937039-45-7  | 339.43  | C22H25N3O2          | Cancer Biology        | HDAC                      | HDAC inhibitor                                                  |
| UNC 0234                                   | 1197196-48-7 | 485.67  | C26H44N7O2          | Cancer Biology        | Histone Methyltransferase | G9a histone methyltransferase inhibitor                         |
| UNC 0646                                   | 1230288-17-2 | 621.9   | C36H58N7O2          | Chromatin/EpiGenetics | Histone Methyltransferase | G9a and GLP inhibitor                                           |

|                                           |              |        |                    |                              |                              |                                                                      |
|-------------------------------------------|--------------|--------|--------------------|------------------------------|------------------------------|----------------------------------------------------------------------|
| DMOG                                      | 8464-83-1    | 175.14 | C8H9NO5            | Chromatin/Epigenetics        | HIF                          | Competitive HIF-PH inhibitor, cell-permeable                         |
| KC7F2                                     | 927822-86-4  | 570.38 | C16H16Cl4N2O4S4    | Cancer Biology               | HIF-1α inhibitor             |                                                                      |
| PI-12                                     | 141400-59-0  | 189.31 | C16H22N2O2         | Chromatin/Epigenetics        | HIF-1 inhibitor              |                                                                      |
| 1,2,3,4,5,6-Hexabromocyclohexane          | 1837-91-8    | 557.54 | C6H8Br6            | Chromatin/Epigenetics        | JAK                          | JAK2 tyrosine kinase inhibitor                                       |
| ZM 440929                                 | 4452-6-6     | 182.22 | C13H10O            | Chromatin/Epigenetics        | JAK                          | JAK3 inhibitor                                                       |
| TCS PIM-1                                 | 401871-58-0  | 367.2  | C18H11BrN2O2       | Chromatin/Epigenetics        | Pim                          | Pim-1 kinase inhibitor,ATP-competitive                               |
| 4-H2N                                     | 461-36-1     | 146.15 | C8H8N2O            | Chromatin/Epigenetics        | PARP                         | PARP inhibitor                                                       |
| JW 55                                     | 664993-53-7  | 434.48 | C25H28N2O5         | Cancer Biology               | PARP                         | PARP domain inhibitor                                                |
| WK14                                      | 838818-26-1  | 521.59 | C20H23N5O3S        | Chromatin/Epigenetics        | PARP                         | Inhibitor of Wnt/β-Catenin signaling and tankyrase                   |
| Sal 003                                   | 1104470-53-4 | 463.21 | C18H15Cl4N3O5      | Cancer Biology               | Protein Ser/Thr Phosphatases | Cellular phosphatase complex inhibitor                               |
| NSC 87877                                 | 56690-57-9   | 459.45 | C19H13N3O7S2       | Chromatin/Epigenetics        | Protein Ser/Thr Phosphatases | Shp2 /shp1 PTP inhibitor                                             |
| Ofoscan                                   | 82419-36-1   | 351.37 | C18H20FN3O4        | DNA Damage/DNA Repair        | Topoisomerase                | Fluoropyrimidine, antitoxics                                         |
| Fasudil (HA-1077) HCl                     | 105628-07-7  | 327.83 | C14H17N3O2S.HCl    | TGF-β / Smad Signaling       | ROCK                         | Protein kinase inhibitor                                             |
| Enfinostat (MS-275,NDX-275)               | 209783-80-2  | 376.4  | C21H22N4O3         | DNA Damage/DNA Repair        | HDAC                         | HDAC1 and HDAC3 inhibitor                                            |
| Romidepsin (FK228, depsipeptide)          | 128517-07-7  | 540.7  | C24H36N4O6S2       | DNA Damage/DNA Repair        | HDAC                         | HDAC1/HDAC2 inhibitor,potent and selective                           |
| Panobinostat (LBH589)                     | 404950-80-7  | 349.43 | C21H23N3O2         | DNA Damage/DNA Repair        | HDAC                         | HDAC inhibitor                                                       |
| (-)-JQ1                                   | 1266524-71-5 | 456.99 | C23H25ClN4O2S      | Chromatin/Epigenetics        | Bromodomain                  | BET bromodomain inhibitor                                            |
| 3-Deazaneplanocin A (DZNep) hydrochloride | 120964-45-6  | 298.73 | C12H14N4O3.HCl     | Stem Cell                    | EZH2                         | SAHH and ENZ2 inhibitor                                              |
| Trichostatin A (TSA)                      | 58880-19-6   | 302.37 | C17H22N2O3         | DNA Damage/DNA Repair        | HDAC                         | HDAC inhibitor                                                       |
| Nanaomycin A                              | 52934-83-5   | 302.28 | C16H14O6           | Chromatin/Epigenetics        | DNA Methyltransferase        | DNMT3B inhibitor                                                     |
| EPZ-5438                                  | 1403254-69-8 | 572.74 | C34H44N4O4         | Chromatin/Epigenetics        | HDAC                         | HDAC inhibitor,potent and selective                                  |
| OID 2011756                               | 838156-11-3  | 366.87 | C22H21ClN2O3       | Chromatin/Epigenetics        | Protein Ser/Thr Phosphatases | PKD inhibitor                                                        |
| TAK-632                                   | 1228591-30-7 | 554.52 | C27H18F4N4O3S      | MAPK Signaling               | Raf                          | Pan-RAF inhibitor,potent and selective                               |
| Spilornicin                               | 5690-3-9     | 198.22 | C13H10O2           | Chromatin/Epigenetics        | Sirtuin                      | inhibitor of Sirt2 and RMLP-induced free radicals                    |
| Tenovin-6                                 | 1011567-82-0 | 454.6  | C25H34N4O2S        | Chromatin/Epigenetics        | Sirtuin                      | SIRT inhibitor,potent and selective                                  |
| Ge 0693                                   | 133055-19-7  | 442.51 | C24H28N4O3         | TGF-β / Smad Signaling       | PKC                          | pan-PKC inhibitor                                                    |
| Cytarabine                                | 147-94-4     | 243.2  | C8H13N3O5          | DNA Damage/DNA Repair        | DNA Synthesis                | cytotoxic agent, blocks DNA synthesis                                |
| Sotrasaurin (AEB071)                      | 425837-18-9  | 438.48 | C25H22N8O2         | TGF-β / Smad Signaling       | PKC                          | PKC inhibitor                                                        |
| Tubastatin A HCl                          | 1310693-62-5 | 371.88 | C20H21N3O2.HCl     | DNA Damage/DNA Repair        | HDAC                         | HDAC6 inhibitor,potent and selective                                 |
| Tankyrase inhibitors (TNKS) 49            |              | 448.54 | C24H24N4O3S        | Chromatin/Epigenetics        | PARP                         | Tankyrase inhibitor                                                  |
| Septin1                                   | 13098-73-2   | 198.64 | C18H24N4O4         | Chromatin/Epigenetics        | Protein Ser/Thr Phosphatases | Selective PIP1R15A inhibitor                                         |
| MCB-013                                   | 1162656-22-5 | 305.37 | C19H19N3O          | Chromatin/Epigenetics        | Histone Acetyltransferases   | stimulator of steroid receptor coactivator (SRC)                     |
| RGFP966                                   | 1357389-11-7 | 362.4  | C21H19FN4O         | DNA Damage/DNA Repair        | HDAC                         | Specific HDAC3 inhibitor                                             |
| TMP269                                    | 1314890-29-3 | 514.52 | C25H21F3N4O3S      | DNA Damage/DNA Repair        | HDAC                         | HDAC 4/5/7/9 inhibitor                                               |
| UNC959                                    | 885325-71-3  | 431.91 | C20H16ClFN6O5      | Cell Cycle/Checkpoint        | Aurora Kinase                | Aurora A inhibitor,potent and selective                              |
| HTH-01-015                                | 1314241-44-5 | 338.24 | C15H20BrN3O        | Chromatin/Epigenetics        | Bromodomain                  | LMISBL antagonist,potent and selective                               |
| Rucaparib (free base)                     | 1613724-42-7 | 468.55 | C26H28N8O          | PI3K/Akt/mTOR Signaling      | AMPK                         | NUAK1 inhibitor,highly specific and selective                        |
| MS436                                     | 283173-50-2  | 323.36 | C19H18FN3O         | Chromatin/Epigenetics        | PARP                         | Potent PARP inhibitor                                                |
| GSK1324726A                               | 1365084-25-9 | 383.42 | C18H17N5O3S        | Chromatin/Epigenetics        | Bromodomain                  | BRD4 inhibitor                                                       |
| Eli1                                      | 1300301-52-0 | 434.91 | C24H24ClN2O3       | Chromatin/Epigenetics        | Bromodomain                  | BET proteins inhibitor                                               |
| CPI-203                                   | 1418308-27-6 | 390.48 | C23H26N4O2         | Stem Cell                    | EZH2                         | EZH2 inhibitor                                                       |
| UNC 0631                                  | 1446144-04-2 | 399.9  | C19H18ClN5O5       | Chromatin/Epigenetics        | Bromodomain                  | BET bromodomain inhibitor                                            |
| GLP50634                                  | 1320288-19-4 | 635.03 | C37H61N7O2         | Chromatin/Epigenetics        | Histone Methyltransferase    | G9a inhibitor                                                        |
| ABCD24040                                 | 1206161-67-8 | 425.5  | C21H23N5O3S        | JAK/STAT Signaling           | JAK                          | JAK1 inhibitor                                                       |
| Valproic acid                             | 915385-91-8  | 360.91 | C8H16O2            | Cytoskeleton Kinase-2        | HDAC                         | Sphingosine Kinase-2                                                 |
| Dorsomorphin 2HCl                         | 96-06-1      | 144.21 | C8H16O2            | DNA Damage/DNA Repair        | HDAC                         | HDAC1 inhibitor                                                      |
| Phenformin HCl                            | 1219168-18-9 | 472.41 | C24H25N5O2.HCl     | PI3K/Akt/mTOR Signaling      | AMPK                         | AMPK inhibitor                                                       |
| WZ4003                                    | 834-28-6     | 241.72 | C10H16ClN5         | Others                       | Others                       | biguanide drug with anti-diabetic activity                           |
| Divalproex Sodium                         | 1214265-58-3 | 466.99 | C25H26ClN6O3       | Ubiquitination/ Proteasome   | Autophagy                    | NUAK1/2 inhibitor, potent and selective                              |
| Procabazine HCl                           | 76594-70-8   | 310.41 | C8H16O2.C8H15O2.Na | Others                       | DNA Synthesis                | Epilepsy/primigravida/bipolar disorder medicine                      |
| Mizoribine                                | 366-70-1     | 257.76 | C12H19N3O.HCl      | DNA Damage/DNA Repair        | IMPDH                        | Antineoplastic chemotherapy drug                                     |
| -IBET-762                                 | 1206067-17-2 | 423.9  | C22H22ClN5O2       | Others                       | Bromodomain                  | DNA/RNA synthesis inhibitor                                          |
| RVX-209                                   | 1044870-39-4 | 370.4  | C22H22ClN5O2       | Chromatin/Epigenetics        | Bromodomain                  | BET inhibitor,highly potent                                          |
| -IBET151 (GSK1210151A)                    | 1300301-49-5 | 415.44 | C23H21N5O3         | Chromatin/Epigenetics        | Bromodomain                  | Potent BET bromodomain inhibitor                                     |
| C646                                      | 328998-36-1  | 445.42 | C24H19N3O6         | Chromatin/Epigenetics        | Bromodomain                  | Selective BET inhibitor                                              |
| JIB-04                                    | 190566-05-9  | 308.78 | C17H13ClN4         | Chromatin/Epigenetics        | Histone Acetyltransferases   | HAT p300-CBP inhibitor,cell-permeable                                |
| OG-L002                                   | 1357302-64-7 | 225.29 | C15H15NO           | Chromatin/Epigenetics        | Histone Demethylases         | Junon histone demethylase inhibitor                                  |
| MM-102                                    | 1417329-24-6 | 669.8  | C35H46F2N7O4       | Chromatin/Epigenetics        | Histone Methyltransferase    | LSO1 inhibitor,potent and specific                                   |
| UNC1999                                   | 1431612-23-5 | 569.74 | C33H33N4O2         | Chromatin/Epigenetics        | Histone Methyltransferase    | MLL1 inhibitor,high-affinity peptidomimetic                          |
| Donepezil HCl                             | 120011-70-3  | 415.65 | C24H30ClN3O3       | Chromatin/Epigenetics        | EZH2 inhibitor               | HDAC inhibitor,potent and selective                                  |
| SGI-1027                                  | 1020149-73-8 | 461.52 | C27H23N7O          | Chromatin/Epigenetics        | HDAC                         | HDAC inhibitor,potent and selective                                  |
| Sodium butyrate                           | 156-54-7     | 110.09 | C4H7NaO2           | Chromatin/Epigenetics        | HDAC                         | HDAC inhibitor                                                       |
| Meftormin HCl                             | 1115-70-4    | 165.62 | C4H7ClN2O3         | Chromatin/Epigenetics        | HDAC                         | HDAC inhibitor                                                       |
| Nedaplatin                                | 95734-82-0   | 303.17 | C22H22Cl2O3Pt      | Chromatin/Epigenetics        | HDAC                         | HDAC inhibitor                                                       |
| Mitoxantrone HCl                          | 70476-82-3   | 517.4  | C22H20ClN4O4.HCl   | Chromatin/Epigenetics        | HDAC                         | HDAC inhibitor                                                       |
| Ro 31-8220 Mesylate                       | 138486-18-6  | 553.85 | C25H23N5O2S.HClO3S | Chromatin/Epigenetics        | HDAC                         | HDAC inhibitor                                                       |
| Tranilcipron                              | 72469-41-4   | 627.64 | C32H37N1O2         | DNA Damage/DNA Repair        | Topoisomerase                | Topoisomerase II inhibitor,anthracycline antibiotic                  |
| Inaulin                                   | 904271-10-1  | 469.58 | C26H19N5O5S2       | DNA Damage/DNA Repair        | Topoisomerase                | 48RT1 inhibitor,anthracycline antibiotic                             |
| MG 149                                    | 1243583-85-8 | 340.46 | C22H28O3           | Chromatin/Epigenetics        | HDAC                         | HAT inhibitor                                                        |
| Nexrutastat A                             | 1403783-31-2 | 341.4  | C19 H23 N3 O3      | Chromatin/Epigenetics        | HDAC                         | HDAC6 inhibitor,highly potent and selective                          |
| BMS-345541 (free base)                    | 445430-58-0  | 255.32 | C14H17N5           | Chromatin/Epigenetics        | HDAC                         | IKK-1/IKK-2 inhibitor,potent and selective                           |
| CPI-109                                   | 1450855-76-1 | 529.85 | C25H28N4O5S        | Stem Cell                    | EZH2                         | EZH2 inhibitor                                                       |
| Santacuzamate A (CAY10883)                | 1477949-42-0 | 278.35 | C15H22N2O3         | DNA Damage/DNA Repair        | HDAC                         | HDAC inhibitor, potent and selective                                 |
| Procinamide HCl                           | 614-39-1     | 271.79 | C13H22ClN3O        | Membrane Transporter/Channel | Sodium Channel               | sodium channel blocker                                               |
| CAY10803                                  | 104572-66-2  | 446.5  | C22H30N4O6         | DNA Damage/DNA Repair        | HDAC                         | potent and selective inhibitor of HDAC6                              |
| PF-12                                     | 1627676-59-8 | 469.52 | C23H25F4N3O3S      | Chromatin/Epigenetics        | Histone Methyltransferase    | SETD7 methyltransferase inhibitor                                    |
| Rimodulin                                 | 1622921-15-6 | 363.28 | C15H15BrN4AS       | Chromatin/Epigenetics        | Histone Acetyltransferases   | SAH10 inhibitor                                                      |
| ML324                                     | 1222800-79-4 | 349.43 | C21H23N3O2         | Chromatin/Epigenetics        | Histone Demethylases         | JMJD2 demethylase inhibitor, potent and cell-permeable               |
| SP2509                                    | 1423715-00-6 | 437.9  | C19H20ClN3O6S      | Chromatin/Epigenetics        | Histone Demethylases         | Demethylase 1 (LSD1) antagonist, novel Lysine-specific               |
| OF-1                                      | 191973-83-4  | 440.31 | C17H18BrN4O4S      | Chromatin/Epigenetics        | Bromodomain                  | BRPF18 and BRPF2 bromodomain inhibitor                               |
| GSK 5659                                  | 901245-66-6  | 364.47 | C22H28N4O3         | Chromatin/Epigenetics        | Bromodomain                  | BRPF1 bromodomain inhibitor                                          |
| A 366                                     | 1527503-11-2 | 329.44 | C16H27N3O2         | Chromatin/Epigenetics        | Histone Methyltransferase    | G9a/GLP histone lysine methyltransferase inhibitor                   |
| WDR5 0103                                 | 890190-22-4  | 383.44 | C21H25N3O4         | Chromatin/Epigenetics        | Histone Methyltransferase    | WD repeat-containing protein 5 (WDR5) antagonist                     |
| GSK-LSO1 2HCl                             | 1431368-48-7 | 289.24 | C14H22Cl2N2        | Chromatin/Epigenetics        | Histone Demethylases         | irreversible, and selective LSO1 inhibitor                           |
| EPZ015668                                 | 1618391-65-1 | 383.44 | C20H25N5O3         | Chromatin/Epigenetics        | Histone Methyltransferase    | PRMT5 inhibitor                                                      |
| Mirn                                      | 1166097-97-0 | 220.25 | C10H16N2O2S        | Cell Cycle/Checkpoint        | ATM/ATR                      | Jnet1-Rad50-Abs1 (MRE11A-ATM pathway inhibitor                       |
| IOX 1                                     | 1380672-07-0 | 529.95 | C25H16ClN7O3S      | Chromatin/Epigenetics        | Histone Demethylases         | histone demethylase JMJD inhibitor                                   |
| GSK J2                                    | 1394854-52-4 | 389.45 | C22H23N5O2         | Chromatin/Epigenetics        | Histone Demethylases         | inactive congener of GSK J1, JMJD3 (KDM6B) and UTX (KDM6A) inhibitor |
| G007-LK                                   | 1380672-07-0 | 529.95 | C25H16ClN7O3S      | DNA Damage/DNA Repair        | tankyrase                    | tankyrase 1/2 inhibitor                                              |
| GSK503                                    | 1346572-63-1 | 526.67 | C31H38N8O2         | Stem Cell                    | EZH2                         | EZH2 inhibitor                                                       |
| F02218                                    | 223387-75-5  | 280.66 | C12H16ClN4O4       | Angiogenesis                 | HIF                          | HIF prolyl hydroxylase inhibitor                                     |
| Molidustat (BAY85-3934)                   | 1154028-82-6 | 314.3  | C13H14N8O2         | Chromatin/Epigenetics        | HIF                          | Novel HIF-PH inhibitor                                               |
| GSK2879552                                | 1401666-69-5 | 364.48 | C23H28N2O2         | Chromatin/Epigenetics        | Histone Demethylases         | Novel and irreversible LSO1 inhibitor                                |
| ORY-1001                                  | 1431326-61-2 | 303.27 | C15H24Cl2N2        | DNA Damage/DNA Repair        | HDAC                         | Selective inhibitor of KDM1A                                         |
| BET bromodomain inhibitor                 | 1380087-96-7 | 365.51 | C22H16ClN3O2       | Chromatin/Epigenetics        | Bromodomain                  | Potent and selective inhibitor for BRD4                              |
| CT20046                                   | 877860-67-7  | 278.35 | C14H16N4O2S        | Chromatin/Epigenetics        | Histone Methyltransferase    | Novel PRMT1 inhibitor                                                |
| Chidamide                                 | 743420-02-2  | 360.41 | C22H19FN4O2        | Chromatin/Epigenetics        | HDAC                         | Novel HDAC inhibitor                                                 |
| Decormotin(VX-509)                        | 944842-54-0  | 362.38 | C18H19F3N8O        | Chromatin/Epigenetics        | JAK                          | Selective and orally active JAK3 inhibitor                           |
| ACY-241                                   | 1316215-12-9 | 467.95 | C24H26ClN6O3       | Chromatin/Epigenetics        | HDAC                         | Selective and orally active HDAC6 inhibitor                          |
| LFMA-113                                  | 244240-24-2  | 360    | C11H16BrN2O2       | Angiogenesis                 | BTX                          | BTX-specific tyrosine kinase inhibitor                               |
| UF 010                                    | 537672-241-6 | 271.15 | C11H15BrN2O        | Chromatin/Epigenetics        | HDAC                         | Novel and selective class I HDAC inhibitor                           |
| BML-210(CAY10433)                         | 537034-17-6  | 339.43 | C20H25N3O2         | Chromatin/Epigenetics        | HDAC                         | Novel HDAC inhibitor                                                 |
| 2-heptyl-4-Pentynoic Acid                 | 96017-59-3   | 182.26 | C11H18O2           | Chromatin/Epigenetics        | HDAC                         | Potent and robust HDACs inhibitor                                    |
| Tracetyl Resveratrol                      | 42205-04-0   | 354.35 | C20H18O6           | Chromatin/Epigenetics        | Sirtuin                      | Cell-permeable resveratrol produg                                    |
| 2,4-Pyridinedicarboxylic Acid             | 469-80-9     | 197.12 | C5H3NO4            | Chromatin/Epigenetics        | Histone Demethylases         | Histone LSD inhibitor                                                |
| PF14                                      | 900305-37-5  | 380.44 | C21H24N4O3         | Chromatin/Epigenetics        | Bromodomain                  | Potent and selective BRPF1 Bromodomain inhibitor                     |
| Suberoyldiamic Acid                       | 38937-66-5   | 204.22 | C8H16N2O4          | Chromatin/Epigenetics        | HDAC                         | HDAC inhibitor                                                       |
| MN 64                                     | 92831-11-3   | 264.32 | C18H16O2           | DNA Damage/DNA Repair        | tankyrase                    | tankyrase inhibitor                                                  |
| GSK2801                                   | 1616694-68-1 | 371.45 | C20H21ClN4AS       | Chromatin/Epigenetics        | Bromodomain                  | inhibitor of BAZ2A and BAZ2B bromodomains                            |
| PI-478 2HCl                               | 186586-44-0  | 384.12 | C13H20Cl4N4O3      | Chromatin/Epigenetics        | HIF-1α inhibitor             | HIF-1α inhibitor                                                     |
| SirReal2                                  | 709002-46-0  | 420.55 | C22H20N4O5S2       | Chromatin/Epigenetics        | HIF                          | Sirt2 inhibitor                                                      |
| SGC707                                    | 1687736-54-4 | 268.34 | C16H18N4O2         | Chromatin/Epigenetics        | Histone Methyltransferase    | PRMT3 inhibitor                                                      |
| AS8361                                    | 796-42-9     | 261.3  | C17H13N3O2         | Chromatin/Epigenetics        | Histone Demethylases         | histone demethylase inhibitor                                        |
| Diagnosis test(GSK1278983)                | 960539-70-2  | 393.43 | C12H16ClN4O2       | Angiogenesis                 | HIF                          | HIF prolyl hydroxylase inhibitor                                     |
| LLY507                                    | 1763053-37-8 | 574.76 | C36H42N8O          | Chromatin/Epigenetics        | Histone Methyltransferase    | SMYD2 inhibitor                                                      |
| Picolinamide                              | 1452-77-3    | 122.12 | C8H8N2O            | DNA Damage/DNA Repair        | PARP                         | poly (ADP-ribose) synthetase inhibitor                               |
| Benzamide                                 | 55-21-0      | 121.14 | C7H7NO             | DNA Damage/DNA Repair        | PARP                         | poly (ADP-ribose) synthetase inhibitor                               |
| GSK591                                    | 1616391-87-7 | 380.48 | C22H28N4O2         | Chromatin/Epigenetics        | Histone Methyltransferase    | PRMT5 inhibitor                                                      |
| MS023                                     | 1831110-54-3 | 287.4  | C17H25N3O2         | Chromatin/Epigenetics        | Histone Methyltransferase    | PRMT5 inhibitor                                                      |
| Br-7273                                   | 1883420-21-7 | 353.41 | C20H23N3O3         | Chromatin/Epigenetics        | Bromodomain                  | BRD9 bromodomain inhibitor                                           |
| AGK 2                                     | 304866-28-4  | 434.27 | C23H13Cl2N3O2      | Chromatin/Epigenetics        | Sirtuin                      | SIRT2 inhibitor, potent and selective                                |
| Tranylcypromine hydrochloride             | 1986-47-6    | 169.85 | C9H11N1Cl          | Chromatin/Epigenetics        | Histone Demethylases         | carbamate/polyamine oxidase (MAO) inhibitor                          |
| (R)-(+)-Etomoxif sodium salt              | 826934-44-4  | 320.74 | C15H18BrN2O4       | Chromatin/Epigenetics        | Histone Acetyltransferases   | camptine/palmitoyltransferase I (CPT1) inhibitor                     |
| PF3                                       | 1818083-80-8 | 321.37 | C16H19N3O2         | Chromatin/Epigenetics        | Bromodomain                  | inhibitor of poly(ubrono 1) and SMARCA4                              |
| UNC 0642                                  | 1481677-76-4 | 546.7  | C20H44F2N6O2       | Chromatin/Epigenetics        | Histone Methyltransferase    | G9a and GLP histone lysine methyltransferase inhibitor               |
| CPI-637                                   | 1884712-47-3 | 386.45 | C22H22N6O          | Chromatin/Epigenetics        | Bromodomain                  | CBP/EP300 bromodomain inhibitor                                      |
| ITS-A1 (ITS-A1)                           | 200626-61-5  | 292.12 | C13H7Cl2N3O        | Chromatin/Epigenetics        | HDAC                         | HDAC activator via Trichostatin A (TSA) suppression                  |
| Thienylisoyl                              | 1429749-41-6 | 581.37 | C34H35N3O3S        | Chromatin/Epigenetics        | JAK                          | Syk/JAK inhibitor                                                    |
| Cerdulatinib (PRT062070)                  | 1168300-79-6 | 445.54 | C20H27N7O3S        | Chromatin/Epigenetics        | JAK                          | protein tyrosine phosphatase (PTP) inhibitor                         |
| PTP inhibitor I                           | 2632-13-5    | 229.1  | C9H9BrO2           | Chromatin/Epigenetics        | Protein Ser/Thr Phosphatases | tyrosine phosphatase (PTP) inhibitor                                 |
| PTP inhibitor I                           | 2491-38-5    | 215    | C8H7BrO2           | Chromatin/Epigenetics        | Protein Ser/Thr Phosphatases | tyrosine phosphatase (PTP) inhibitor                                 |
| β-Glycerolphosphate (sodium salt hydrate) | 1219807-87-0 | 360.2  | C14H16BrN2O3       | Chromatin/Epigenetics        | Protein Ser/Thr Phosphatases | class I and class II histone deacetylase (HDAC) inhibitor            |
| Parthenolide                              | 13408-09-9   | 305.1  | C23H29O8           | Chromatin/Epigenetics        | Protein Ser/Thr Phosphatases | protein phosphatase inhibitor                                        |
| 6-gingerol                                | 20554-84-1   | 248.32 | C15H20O3           | Immunology/Inflammation      | NF-κB                        |                                                                      |
| Nicotinamide                              | 23513-14-6   | 294.39 | C17H20O4           | Nature Products              |                              |                                                                      |
| Coumarin                                  | 98-92-0      | 122.13 | C8H8N2O            | Nature Products              |                              |                                                                      |
| Diogenin                                  | 91-84-5      | 146.14 | C8H8O2             | Nature Products              |                              |                                                                      |
|                                           | 512-04-9     | 414.61 | C27H42O3           | Nature Products              |                              |                                                                      |
|                                           |              |        |                    |                              |                              |                                                                      |

|              |            |        |           |                         |      |                 |
|--------------|------------|--------|-----------|-------------------------|------|-----------------|
| Curcumin     | 4871-97-0  | 236.35 | C15H24O2  | Nature Products         |      |                 |
| Quercetin    | 117-39-5   | 302.24 | C15H10O7  | PI3K/Akt/mTOR Signaling | PI3K | Antitumor agent |
| Ginkgolide C | 15291-76-6 | 440.4  | C20H24O11 | Nature Products         |      |                 |
| Fisetin      | 528-48-3   | 286.05 | C15H10O6  | Nature Products         |      |                 |
